# Supplementary material
Source: PubMed Central journal article supplement (PMC5906136)
Supplement: NIHMS943321-supplement-Supp_dataS1.pdf [file NIHMS943321-supplement-Supp_dataS1.pdf]

## Supplementary data

Supplementary Table 1 Primer sequences of genes used in qRT-PCR

| Gene         | Primer sequence                                                                                      |
|--------------|------------------------------------------------------------------------------------------------------|
| <i>Gapdh</i> | Forward Primer: 5' – TCACCACCATGGAGAAGGC – 3'<br>Reverse Primer: 5' – GCTAAGCAGTTGGTGGTGCA – 3'      |
| <i>Postn</i> | Forward Primer: 5' – AAGCTGCGGCAAGACAAG – 3'<br>Reverse Primer: 5' – GGGCTGTGTCAGGAGATCTTT – 3'      |
| <i>Il1a</i>  | Forward Primer: 5' – TTGGTTAAATGACCTGCAACA – 3'<br>Reverse Primer: 5' – GAGCGCTCACGAACAGTTG – 3'     |
| <i>Il1b</i>  | Forward Primer: 5' – CGACAAAATACCTGTGGCCT – 3'<br>Reverse Primer: 5' – TCTTCTTTGGGTATTGCTTGG – 3'    |
| <i>Tnfa</i>  | Forward Primer: 5' – GGCATGGATCTCAAAGACAACC – 3'<br>Reverse Primer: 5' – CAGGTATATGGGCTCATACCAG – 3' |
| <i>Il10</i>  | Forward Primer: 5' – CAGAGCCACATGCTCCTAGA – 3'<br>Reverse Primer: 5' – GTCCAGCTGGTCCTTTGTTT – 3'     |
| <i>Tgfb1</i> | Forward Primer: 5' – GCCCTGGACACCAACTATTG – 3'<br>Reverse Primer: 5' – CGTGTCCAGGCTCCAAATG – 3'      |
| <i>Arg1</i>  | Forward Primer: 5' – CCTGAAGGAACTGAAAGGAAAG – 3'<br>Reverse Primer: 5' – TTGGCAGATATGCAGGGAGT – 3'   |

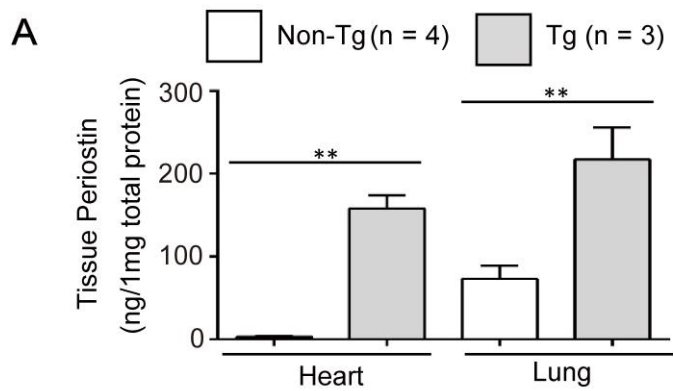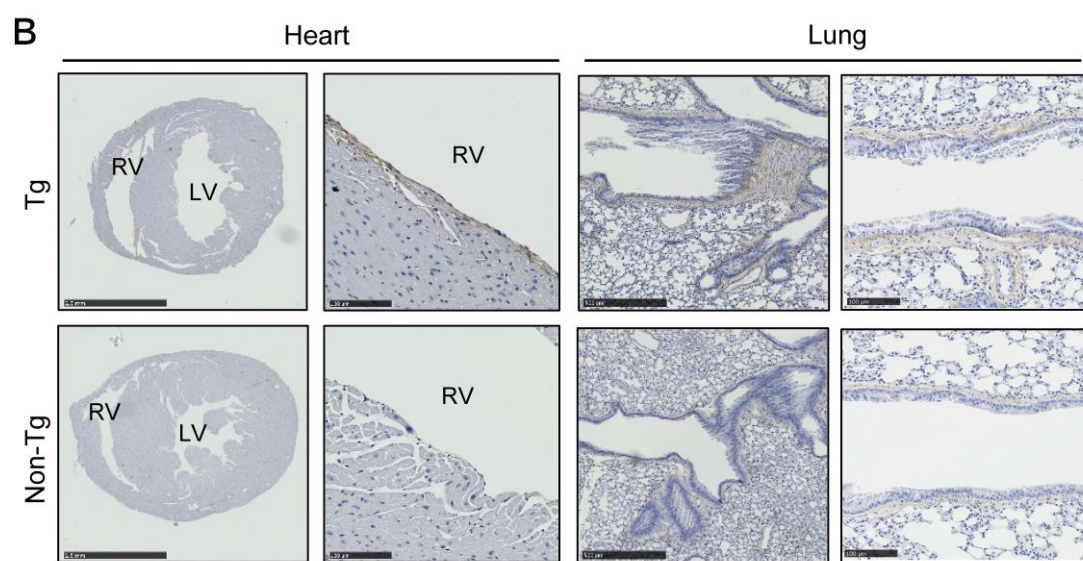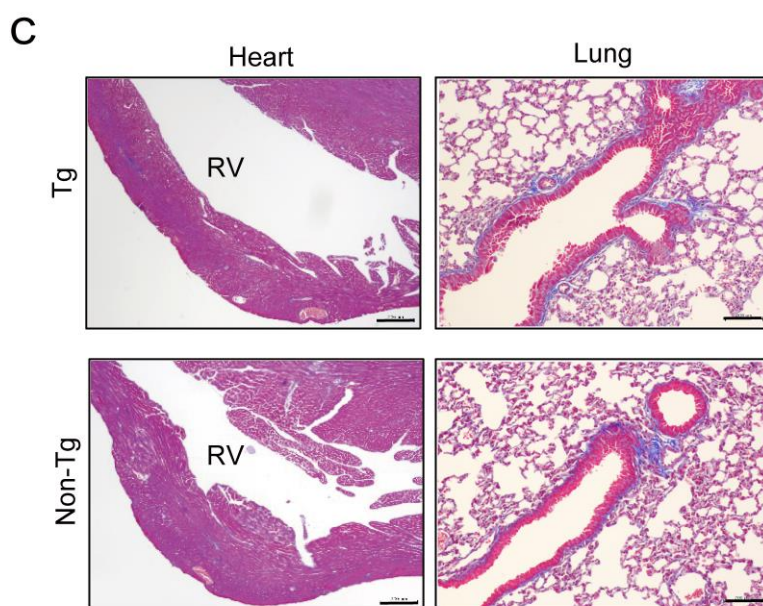

**Figure S1. Histological analysis of heart and lung in *Postn*-overexpressing mice**

(A) Periostin protein in lung or heart homogenate of *Postn*-overexpressing (Tg) mice and non-transgenic (Tg) mice. Protein values were calculated based on 1 mg of the homogenate protein. The data shown are the mean  $\pm$  SE. Statistical analysis was performed using a one-sided, Mann-Whitney *t*-test;  $**p < 0.01$  versus non-Tg. (B, C) Histology of heart (left) and lung (right) of *Postn*-overexpressing (Tg) mice (upper) and non-transgenic (Tg) mice (lower) by immunostaining of periostin (B) or Masson's Trichrome staining (C) RV: right ventricle, LV: left ventricle. Scale bars: 2.5 mm (B, left panels), 100  $\mu$ m (B, the second from left panels), 500  $\mu$ m (B, the second from right panels), 100  $\mu$ m (B, right panels) or 200  $\mu$ m (C).

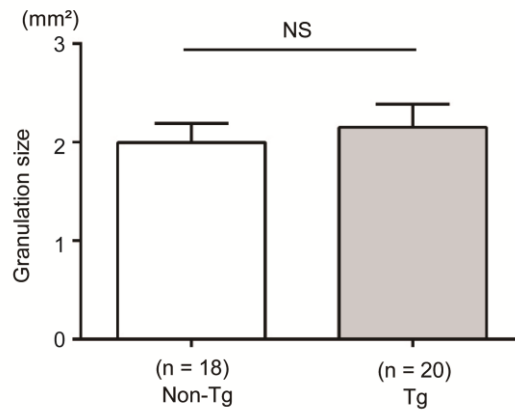

Nunomura *et al.* Figure S2

**Figure S2. Size of granulation tissues in wounded sites of *Postn*-overexpressing and non-transgenic mice**

Tissue sections were collected from *Postn*-overexpressing mice and non-transgenic mice on day 7 after wounding and were stained with H&E. Sizes of granulation tissues were quantitatively measured with an image viewing software (NDP.view2). The data shown are the mean  $\pm$  SE. Statistical analysis was performed using a one-sided, Mann-Whitney *t*-test. NS; not significant

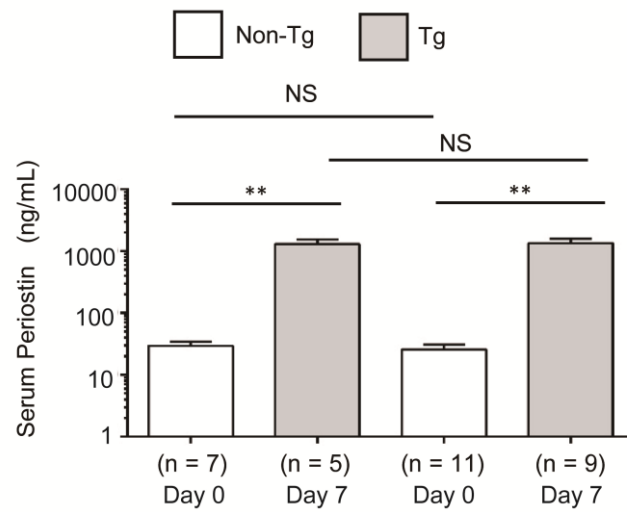

Nunomura *et al.* Figure S3

**Figure S3. Serum periostin during wounding**

Serum periostin on day 0 and day 7 after wounding in *Postn*-overexpressing mice and non-transgenic mice is depicted. The data shown are the mean  $\pm$  SD. Statistical analysis was performed using one-way analysis of variance with multiple comparisons; \*\* $p < 0.01$  versus non-transgenic littermate. NS; not significant
